# Supplementary material
Source: Springer Nature journal article supplement (https://www.springermedizin.de/resource/supplementary/12957_2013_1393_MOESM11_ESM.pdf/9562502)
Supplement: MOESM11 [file 9562502]

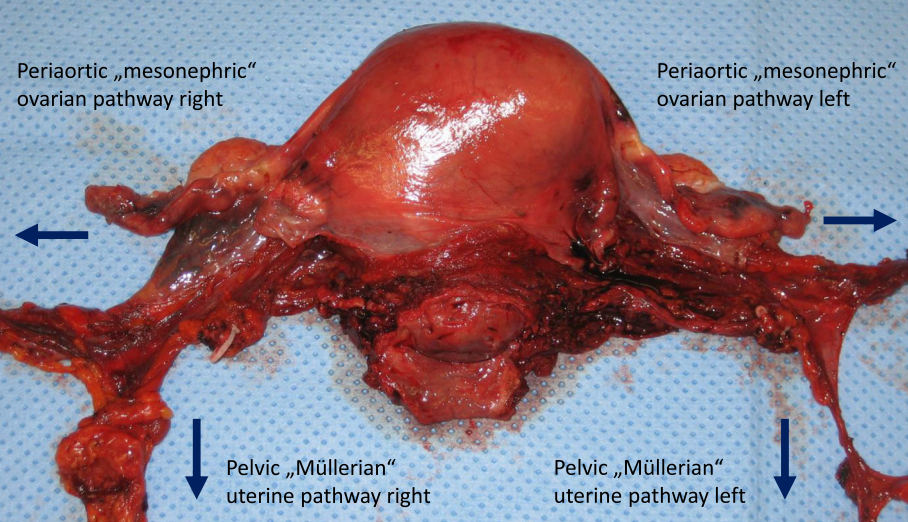

Periaortic „mesonephric“  
ovarian pathway right

Periaortic „mesonephric“  
ovarian pathway left

Pelvic „Müllerian“  
uterine pathway right

Pelvic „Müllerian“  
uterine pathway left
